# Supplementary material for: Direct synthesis of 2-ethylhexanol via n-butanal aldol condensation–hydrogenation reaction integration over a Ni/Ce-Al2O3 bifunctional catalyst
Source: Royal Society of Chemistry journal article supplement (doi:10.1039/c5gc00223k), 2015-01-01
Supplement: c5gc00223k1.pdf [file c5gc00223k1.pdf]

## Appendix A. Supplementary material

### Direct synthesis of 2-ethylhexanol via *n*-butanal aldol condensation-hydrogenation reaction integration over Ni/Ce-Al<sub>2</sub>O<sub>3</sub> bifunctional catalyst

Ning Liang, Xiaolong Zhang, Hualiang An, Xinqiang Zhao\*, Yanji Wang

Hebei Provincial Key Lab of Green Chemical Technology and High Efficient Energy Saving, Hebei University of Technology, Tianjin, 300130, China

\*Corresponding author: Xinqiang Zhao

Postal address:

School of Chemical Engineering and Technology, Hebei University of Technology, No. 8 Guangrong Road, Hongqiao District, Tianjin, 300130, China

E-mail address: [zhaoxq@hebut.edu.cn](mailto:zhaoxq@hebut.edu.cn)

Fax: +86-22-60204294

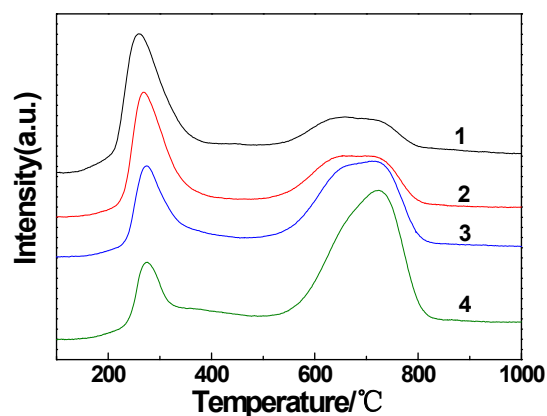

Fig. S1 H<sub>2</sub>-TPR profiles of Ni/Ce-Al<sub>2</sub>O<sub>3</sub> catalysts prepared at different calcination temperatures

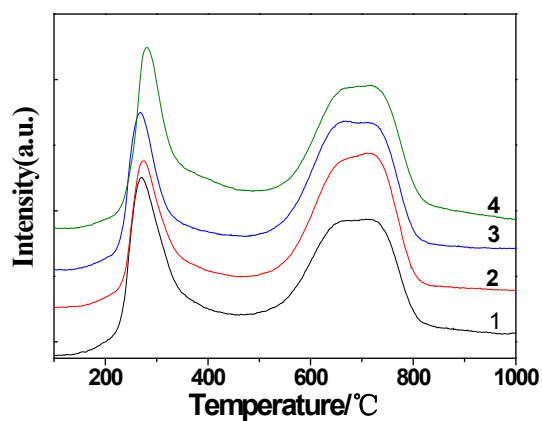

Fig. S2 H<sub>2</sub>-TPR profiles of Ni/Ce-Al<sub>2</sub>O<sub>3</sub> catalysts prepared at different calcination time

1-3 h; 2-4 h; 3-5 h; 4-6 h

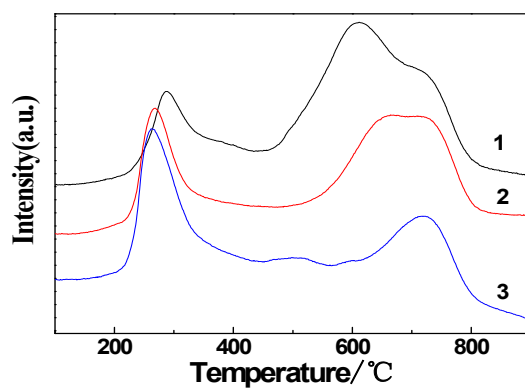

Fig. S3 H<sub>2</sub>-TPR profiles of Ni/Ce-Al<sub>2</sub>O<sub>3</sub> catalysts prepared at different reduction temperature

1-520 °C; 2-570 °C; 3-620 °C

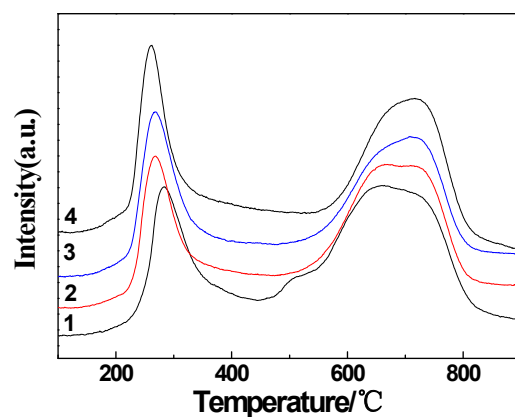

Fig. S4 H<sub>2</sub>-TPR profiles of Ni/Ce-Al<sub>2</sub>O<sub>3</sub> catalysts prepared at different reduction time

1-3 h; 2-4 h; 3-5 h; 4-6 h

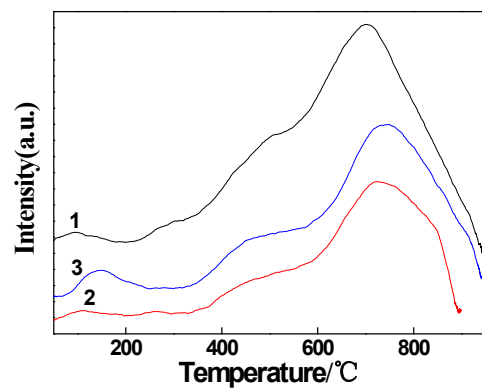

Fig. S5 H<sub>2</sub>-TPD profiles of the fresh and the recovered Ni/Ce-Al<sub>2</sub>O<sub>3</sub> catalysts

1: fresh 2: recovered① 3: recovered②
